# Supplementary material for: Evolution of asexual and sexual reproduction in the aspergilli
Source: PubMed Central journal article supplement — Stud Mycol. 2018 Oct 11;91:37–59. doi: 10.1016/j.simyco.2018.10.002 (PMC6231087; doi:10.1016/j.simyco.2018.10.002), 2018-10-11
Supplement: mmc22.pdf [file mmc22.pdf]

**Supplementary Table 1.** Species employed for bioinformatic analyses in the present study

| Species                            | JGI code    | Phylum name   | Class name        | Reference / Source          |
|------------------------------------|-------------|---------------|-------------------|-----------------------------|
| <i>Cryptococcus neoformans</i>     | Cryne_H99_1 | Basidiomycota | Tremellomycetes   | (Loftus et al., 2005)       |
| <i>Schizophyllum commune</i>       | Schco_LoeD  | Basidiomycota | Agaricomycetes    | (Ohm et al., 2010)          |
| <i>Pleurotus ostreatus</i>         | PleosPC15_2 | Basidiomycota | Agaricomycetes    | (Alfaro et al., 2016)       |
| <i>Coprinopsis cinerea</i>         | Copci1      | Basidiomycota | Agaricomycetes    | (Stajich et al., 2010)      |
| <i>Laccaria bicolor</i>            | Lacbi2      | Basidiomycota | Agaricomycetes    | (Martin et al., 2008)       |
| <i>Amanita muscaria</i>            | Amamu1      | Basidiomycota | Agaricomycetes    | (Kohler et al., 2015)       |
| <i>Ustilago maydis</i>             | Ustma1      | Basidiomycota | Ustilaginomycetes | (Kamper et al., 2006)       |
| <i>Puccinia graminis</i>           | Pucgr2      | Basidiomycota | Pucciniomycetes   | (Duplessis et al., 2011)    |
| <i>Magnaporthe grisea</i>          | Maggr1      | Ascomycota    | Sordariomycetes   | (Dean et al., 2005)         |
| <i>Neurospora crassa</i>           | Neucr2      | Ascomycota    | Sordariomycetes   | (Galagan et al., 2003)      |
| <i>Colletotrichum graminicola</i>  | Colgr1      | Ascomycota    | Sordariomycetes   | (O'Connell et al., 2012)    |
| <i>Fusarium graminearum</i>        | Fusgr1      | Ascomycota    | Sordariomycetes   | (Cuomo et al., 2007)        |
| <i>Trichoderma reesei</i>          | Trire2      | Ascomycota    | Sordariomycetes   | (Martinez et al., 2008)     |
| <i>Botrytis cinerea</i>            | Botci1      | Ascomycota    | Leotiomycetes     | (Amsellem et al., 2011)     |
| <i>Xylona heveae</i>               | Xylhe1      | Ascomycota    | Xylonomycetes     | (Gazis et al., 2016)        |
| <i>Stagonospora nodorum</i>        | Stano2      | Ascomycota    | Dothideomycetes   | (Hane et al., 2007)         |
| <i>Leptosphaeria maculans</i>      | Lepmu1      | Ascomycota    | Dothideomycetes   | (Rouxel et al., 2011)       |
| <i>Cochliobolus heterostrophus</i> | CocheC4_1   | Ascomycota    | Dothideomycetes   | (Condon et al., 2013)       |
| <i>Alternaria alternata</i>        | Altal1      | Ascomycota    | Dothideomycetes   | (Zeiner et al., 2016)       |
| <i>Cladosporium fulvum</i>         | Clafu1      | Ascomycota    | Dothideomycetes   | (de Wit et al., 2012)       |
| <i>Histoplasma capsulatum</i>      | Hisca1      | Ascomycota    | Eurotiomycetes    | (Sharpton et al., 2009)     |
| <i>Talaromyces marneffei</i>       | Talma1_2    | Ascomycota    | Eurotiomycetes    | NCBI                        |
| <i>Talaromyces stipitatus</i>      | Talst1_2    | Ascomycota    | Eurotiomycetes    | NCBI                        |
| <i>Penicillium chrysogenum</i>     | Pench1      | Ascomycota    | Eurotiomycetes    | (van den Berg et al., 2008) |
| <i>Eurotium herbatorum</i>         | Eurhe1      | Ascomycota    | Eurotiomycetes    | (de Vries et al., 2017)     |
| <i>Aspergillus aculeatus</i>       | Aspac1      | Ascomycota    | Eurotiomycetes    | (de Vries et al., 2017)     |
| <i>Aspergillus brasiliensis</i>    | Aspbr1      | Ascomycota    | Eurotiomycetes    | (de Vries et al., 2017)     |
| <i>Aspergillus carbonarius</i>     | Aspca3      | Ascomycota    | Eurotiomycetes    | (de Vries et al., 2017)     |
| <i>Aspergillus flavus</i>          | Aspfl1      | Ascomycota    | Eurotiomycetes    | (Arnaud et al., 2012)       |
| <i>Aspergillus luchuensis</i>      | Aspfo1      | Ascomycota    | Eurotiomycetes    | (de Vries et al., 2017)     |
| <i>Aspergillus fumigatus</i>       | Aspfu1      | Ascomycota    | Eurotiomycetes    | (Galagan et al., 2005)      |
| <i>Aspergillus niger</i>           | Aspni7      | Ascomycota    | Eurotiomycetes    | (Andersen et al., 2011)     |
| <i>Aspergillus nidulans</i>        | Aspnid1     | Ascomycota    | Eurotiomycetes    | (Galagan et al., 2005)      |
| <i>Aspergillus oryzae</i>          | Aspor1      | Ascomycota    | Eurotiomycetes    | (Galagan et al., 2005)      |
| <i>Aspergillus sydowii</i>         | Aspsy1      | Ascomycota    | Eurotiomycetes    | (de Vries et al., 2017)     |
| <i>Aspergillus terreus</i>         | Aspte1      | Ascomycota    | Eurotiomycetes    | (Arnaud et al., 2012)       |
| <i>Aspergillus tubingensis</i>     | Asptu1      | Ascomycota    | Eurotiomycetes    | (de Vries et al., 2017)     |
| <i>Aspergillus versicolor</i>      | Aspve1      | Ascomycota    | Eurotiomycetes    | (de Vries et al., 2017)     |
| <i>Aspergillus wentii</i>          | Aspwe1      | Ascomycota    | Eurotiomycetes    | (de Vries et al., 2017)     |

|                                  |         |            |                       |                               |
|----------------------------------|---------|------------|-----------------------|-------------------------------|
| <i>Aspergillus zonatus</i>       | Aspz01  | Ascomycota | Eurotiomycetes        | (de Vries et al., 2017)       |
| <i>Aspergillus fischeri</i>      | Neofi1  | Ascomycota | Eurotiomycetes        | (Arnaud et al., 2012)         |
| <i>Monascus ruber</i>            | Monru1  | Ascomycota | Eurotiomycetes        | JGI, (Grigoriev et al., 2014) |
| <i>Cladonia grayi</i>            | Clagr3  | Ascomycota | Lecanoromycetes       | JGI, (Grigoriev et al., 2014) |
| <i>Arthrotrichia oligospora</i>  | Artol1  | Ascomycota | Orbiliomycetes        | (Yang et al., 2011)           |
| <i>Tuber melanosporum</i>        | Tubme1  | Ascomycota | Pezizomycetes         | (Martin et al., 2010)         |
| <i>Saccharomyces cerevisiae</i>  | Sacce1  | Ascomycota | Saccharomycetes       | (Goffeau et al., 1996)        |
| <i>Candida albicans</i>          | Canalb1 | Ascomycota | Saccharomycetes       | (Jones et al., 2004)          |
| <i>Pichia pastoris</i>           | Picpa1  | Ascomycota | Saccharomycetes       | (De Schutter et al., 2009)    |
| <i>Schizosaccharomyces pombe</i> | Schpo1  | Ascomycota | Schizosaccharomycetes | (Wood et al., 2002)           |
| <i>Phycomyces blakesleeana</i>   | Phybl2  | Zygomycota | Incertae sedis        | (Corrochano et al., 2016)     |
| <i>Rhizopus delemar</i>          | Rihor3  | Zygomycota | Incertae sedis        | (Ma et al., 2009)             |
| <i>Mucor circinelloides</i>      | Mucci2  | Zygomycota | Incertae sedis        | (Corrochano et al., 2016)     |

## References

- Alfaro, M., et al., 2016. Comparative and transcriptional analysis of the predicted secretome in the lignocellulose-degrading basidiomycete fungus *Pleurotus ostreatus*. *Environ Microbiol.* 18, 4710-4726.
- Amsalem, J., et al., 2011. Genomic analysis of the necrotrophic fungal pathogens *Sclerotinia sclerotiorum* and *Botrytis cinerea*. *PLoS Genet.* 7, e1002230.
- Andersen, M. R., et al., 2011. Comparative genomics of citric-acid-producing *Aspergillus niger* ATCC 1015 versus enzyme-producing CBS 513.88. *Genome Res.* 21, 885-97.
- Arnaud, M. B., et al., 2012. The *Aspergillus* Genome Database (AspGD): recent developments in comprehensive multispecies curation, comparative genomics and community resources. *Nucleic Acids Res.* 40, D653-9.
- Condon, B. J., et al., 2013. Comparative genome structure, secondary metabolite, and effector coding capacity across *Cochliobolus* pathogens. *PLoS Genet.* 9, e1003233.
- Corrochano, L. M., et al., 2016. Expansion of signal transduction pathways in fungi by extensive genome duplication. *Curr Biol.* 26, 1577-1584.
- Cuomo, C. A., et al., 2007. The *Fusarium graminearum* genome reveals a link between localized polymorphism and pathogen specialization. *Science.* 317, 1400-2.
- De Schutter, K., et al., 2009. Genome sequence of the recombinant protein production host *Pichia pastoris*. *Nat Biotechnol.* 27, 561-6.
- de Vries, R. P., et al., 2017. Comparative genomics reveals high biological diversity and specific adaptations in the industrially and medically important fungal genus *Aspergillus*. *Genome Biol.* 18, 28.
- de Wit, P. J., et al., 2012. The genomes of the fungal plant pathogens *Cladosporium fulvum* and *Dothistroma septosporum* reveal adaptation to different hosts and lifestyles but also signatures of common ancestry. *PLoS Genet.* 8, e1003088.

- Dean, R. A., et al., 2005. The genome sequence of the rice blast fungus *Magnaporthe grisea*. *Nature*. 434, 980-6.
- Duplessis, S., et al., 2011. Obligate biotrophy features unraveled by the genomic analysis of rust fungi. *Proc Natl Acad Sci U S A*. 108, 9166-71.
- Galagan, J. E., et al., 2003. The genome sequence of the filamentous fungus *Neurospora crassa*. *Nature*. 422, 859-68.
- Galagan, J. E., et al., 2005. Sequencing of *Aspergillus nidulans* and comparative analysis with *A. fumigatus* and *A. oryzae*. *Nature*. 438, 1105-1115.
- Gazis, R., et al., 2016. The genome of *Xylona heveae* provides a window into fungal endophytism. *Fungal Biol*. 120, 26-42.
- Goffeau, A., et al., 1996. Life with 6000 genes. *Science*. 274, 546, 563-7.
- Grigoriev, I. V., et al., 2014. MycoCosm portal: gearing up for 1000 fungal genomes. *Nucleic Acids Res*. 42, D699-704.
- Hane, J. K., et al., 2007. Dothideomycete plant interactions illuminated by genome sequencing and EST analysis of the wheat pathogen *Stagonospora nodorum*. *Plant Cell*. 19, 3347-68.
- Jones, T., et al., 2004. The diploid genome sequence of *Candida albicans*. *Proc Natl Acad Sci U S A*. 101, 7329-34.
- Kamper, J., et al., 2006. Insights from the genome of the biotrophic fungal plant pathogen *Ustilago maydis*. *Nature*. 444, 97-101.
- Kohler, A., et al., 2015. Convergent losses of decay mechanisms and rapid turnover of symbiosis genes in mycorrhizal mutualists. *Nat Genet*. 47, 410-5.
- Loftus, B. J., et al., 2005. The genome of the basidiomycetous yeast and human pathogen *Cryptococcus neoformans*. *Science*. 307, 1321-4.
- Ma, L. J., et al., 2009. Genomic analysis of the basal lineage fungus *Rhizopus oryzae* reveals a whole-genome duplication. *PLoS Genet*. 5, e1000549.
- Martin, F., et al., 2008. The genome of *Laccaria bicolor* provides insights into mycorrhizal symbiosis. *Nature*. 452, 88-92.
- Martin, F., et al., 2010. Perigord black truffle genome uncovers evolutionary origins and mechanisms of symbiosis. *Nature*. 464, 1033-8.
- Martinez, D., et al., 2008. Genome sequencing and analysis of the biomass-degrading fungus *Trichoderma reesei* (syn. *Hypocrea jecorina*). *Nat Biotechnol*. 26, 553-60.
- O'Connell, R. J., et al., 2012. Lifestyle transitions in plant pathogenic *Colletotrichum* fungi deciphered by genome and transcriptome analyses. *Nat Genet*. 44, 1060-5.
- Ohm, R. A., et al., 2010. Genome sequence of the model mushroom *Schizophyllum commune*. *Nat Biotechnol*. 28, 957-63.
- Rouxel, T., et al., 2011. Effector diversification within compartments of the *Leptosphaeria maculans* genome affected by Repeat-Induced Point mutations. *Nat Commun*. 2, 202.
- Sharpton, T. J., et al., 2009. Comparative genomic analyses of the human fungal pathogens *Coccidioides* and their relatives. *Genome Res*. 19, 1722-31.
- Stajich, J. E., et al., 2010. Insights into evolution of multicellular fungi from the assembled chromosomes of the mushroom *Coprinopsis cinerea* (*Coprinus cinereus*). *Proc Natl Acad Sci U S A*. 107, 11889-94.
- van den Berg, M. A., et al., 2008. Genome sequencing and analysis of the filamentous fungus *Penicillium chrysogenum*. *Nat Biotechnol*. 26, 1161-8.
- Wood, V., et al., 2002. The genome sequence of *Schizosaccharomyces pombe*. *Nature*. 415, 871-80.
- Yang, J., et al., 2011. Genomic and proteomic analyses of the fungus *Arthrobotrys oligospora* provide insights into nematode-trap formation. *PLoS Pathog*. 7, e1002179.
- Zeiner, C. A., et al., 2016. Comparative Analysis of Secretome Profiles of Manganese(II)-Oxidizing Ascomycete Fungi. *PLoS One*. 11, e0157844.
