# Supplementary material for: Evolution of asexual and sexual reproduction in the aspergilli
Source: PubMed Central journal article supplement — Stud Mycol. 2018 Oct 11;91:37–59. doi: 10.1016/j.simyco.2018.10.002 (PMC6231087; doi:10.1016/j.simyco.2018.10.002), 2018-10-11
Supplement: mmc23.pdf [file mmc23.pdf]

**Supplementary Table 2.** Primers used for studies of the heterologous expression of *abaA* in *Monascus ruber*

| Name                 | Sequence (5'→3')                                           | Description                                                                              |
|----------------------|------------------------------------------------------------|------------------------------------------------------------------------------------------|
| P <sub>trpC</sub> -F | GTCGACAGAAGATGATATTG                                       | For amplification of the 372 bp of the <i>trpC</i> promoter region from the plasmid pSKH |
| P <sub>trpC</sub> -R | CATATCGATGCTTGGGTAGAATA                                    |                                                                                          |
| abaA-F               | <u>TATTCTACCCAAGCATCGATATGATGGCTACT</u><br>GACTGGCAACC     | For amplification of the 2492 bp <i>abaA</i> coding region                               |
| abaA-R               | <u>CTAGAAGGCACTCTTTGCTGCTTGGCTAGAC</u><br>AGCCTCAACCGCAG   |                                                                                          |
| T <sub>trpC</sub> -F | CCAAGCAGCAAAGAGTGCCTTCTAG                                  | For amplification of the 597 bp of the <i>trpC</i> terminal regions                      |
| T <sub>trpC</sub> -R | <u>GGTTACGGTTCGATGGGGTTGAGTTGGCTA</u><br>GAAAGAAGGATTACCTC |                                                                                          |
| neo-F                | CCAACTCAACCCCATCGAACCGTAACC                                | For amplification of the 1221 bp of the <i>neo</i> cassette from plasmid pKN1            |
| neo-R                | CTAGAAAGAAGGATTACCTC                                       |                                                                                          |

The primer sequences underlined by straight lines are overlap regions for fusing PCR.
