# Supplementary material for: Evolution of asexual and sexual reproduction in the aspergilli
Source: PubMed Central journal article supplement — Stud Mycol. 2018 Oct 11;91:37–59. doi: 10.1016/j.simyco.2018.10.002 (PMC6231087; doi:10.1016/j.simyco.2018.10.002), 2018-10-11
Supplement: mmc24.pdf [file mmc24.pdf]

**Supplementary Table 3:** Details of *Aspergillus clavatus* isolates used in the present study and their *MAT locus* genotype

| <b>Nottingham Number (BDUN) *</b> | <b>Alternative strain number(s)<sup>†</sup></b> | <b>Isolation site</b> | <b>Country</b> | <b>State/County</b> | <b><i>MAT Locus</i></b> |
|-----------------------------------|-------------------------------------------------|-----------------------|----------------|---------------------|-------------------------|
| 65-1                              | NRRL A-28596                                    | Wheat                 | USA            | Oklahoma,           | 1-1                     |
| 62-2                              | NRRL 1823                                       | Atypical strain       | Unknown        | —                   | 1-1                     |
| 65-3                              | NRRL A-404                                      | Corn Ontario          | Canada         | —                   | 1-2                     |
| 65-4                              | NRRL A-251                                      | Soil                  | Venezuela      |                     | 1-2                     |
| 65-5                              | NRRL A-803                                      | Soil                  | Nicaragua      | —                   | 1-2                     |
| 65-6                              | NRRL A-25278                                    | Air                   | Hungary        | Budapest            | 1-2                     |
| 65-7                              | NRRL A-3072                                     | Soil                  | Liberia        |                     | 1-1                     |
| 65-8                              | NRRL 5811, CBS 344.67                           | Soil                  | Romania        | Moldavia            | 1-1                     |
| 65-9                              | NRRL A-14611                                    | Stored corn           | USA            | Austin              | 1-2                     |
| 65-10                             | NRRL A-26725                                    | Wheat                 | USA            | Nebraska            | 1-1                     |
| 65-11                             | NRRL A-22162                                    | Corn                  | USA            | Iowa                | 1-1                     |
| 65-12                             | NRRL A-7813                                     | Soil                  | Jamaica        | —                   | 1-2                     |
| 65-13                             | NRRL A-24204                                    | Corn                  | USA            | North Carolina      | 1-2                     |
| 65-14                             | NRRL A-22359                                    | European corn borer   | USA            | Missouri            | 1-1                     |
| 65-15                             | NRRL A-8053                                     | Insect dung           | USA            | Indiana             | 1-1                     |
| 65-16                             | ATCC 10058, CBS 514.65                          | Dung                  | British Guiana | —                   | 1-2                     |
| 65-17                             | NRRLA-3880                                      | Soil                  | Formosa        | —                   | 1-2                     |
| 65-18                             | NRRLA-2905 QM 872                               | Japanese tarpaulin    | New Guinea     | —                   | 1-1                     |
| 65-19                             | NRRL A-14401                                    | Raw sewage            | USA            | New York, Ithaca    | 1-2                     |
| 65-20                             | NRRL A-22620                                    | Soil                  | India          | Lucknow             | 1-2                     |

\* NRRL, Agricultural Research Service Culture Collection; CBS, Centraal Bureau voor Schimmelcultures; ATCC, American Type Culture Collection.
