# Supplementary figures and images for: Evolution of asexual and sexual reproduction in the aspergilli
Source: PubMed Central journal article supplement — Stud Mycol. 2018 Oct 11;91:37–59. doi: 10.1016/j.simyco.2018.10.002 (PMC6231087; doi:10.1016/j.simyco.2018.10.002), 2018-10-11

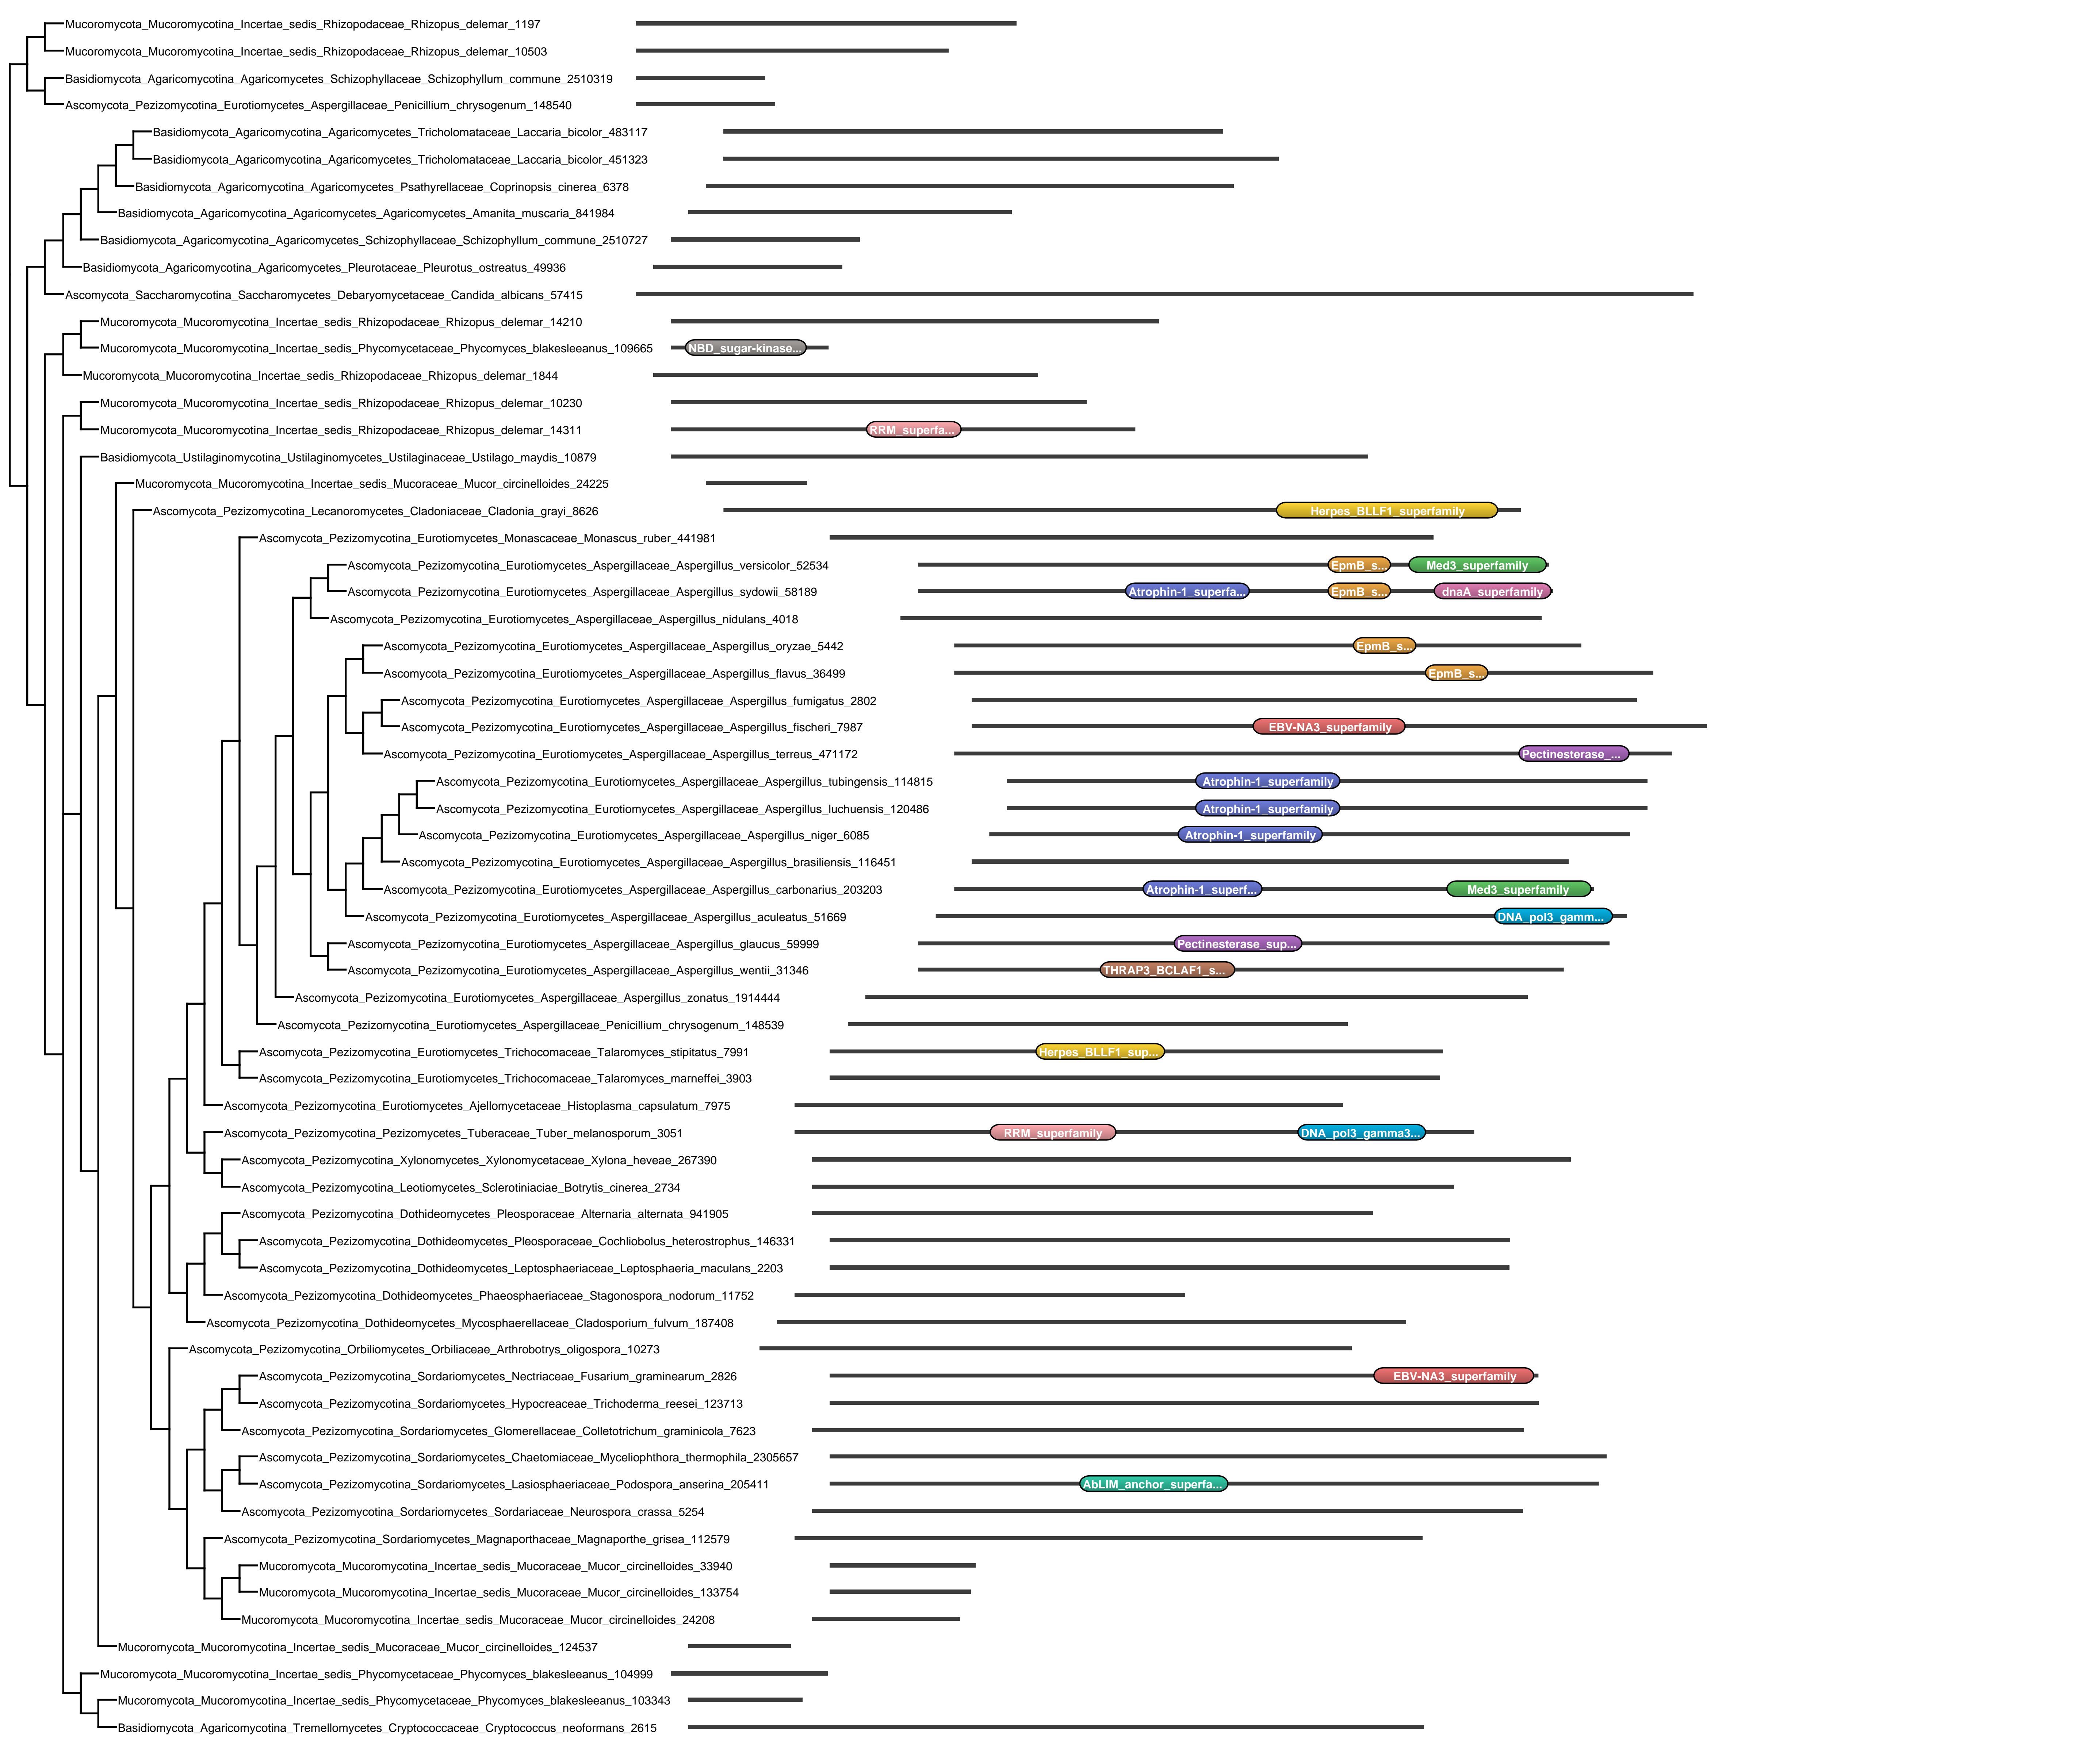

Supplement: mmc10.pdf [file mmc10.pdf]

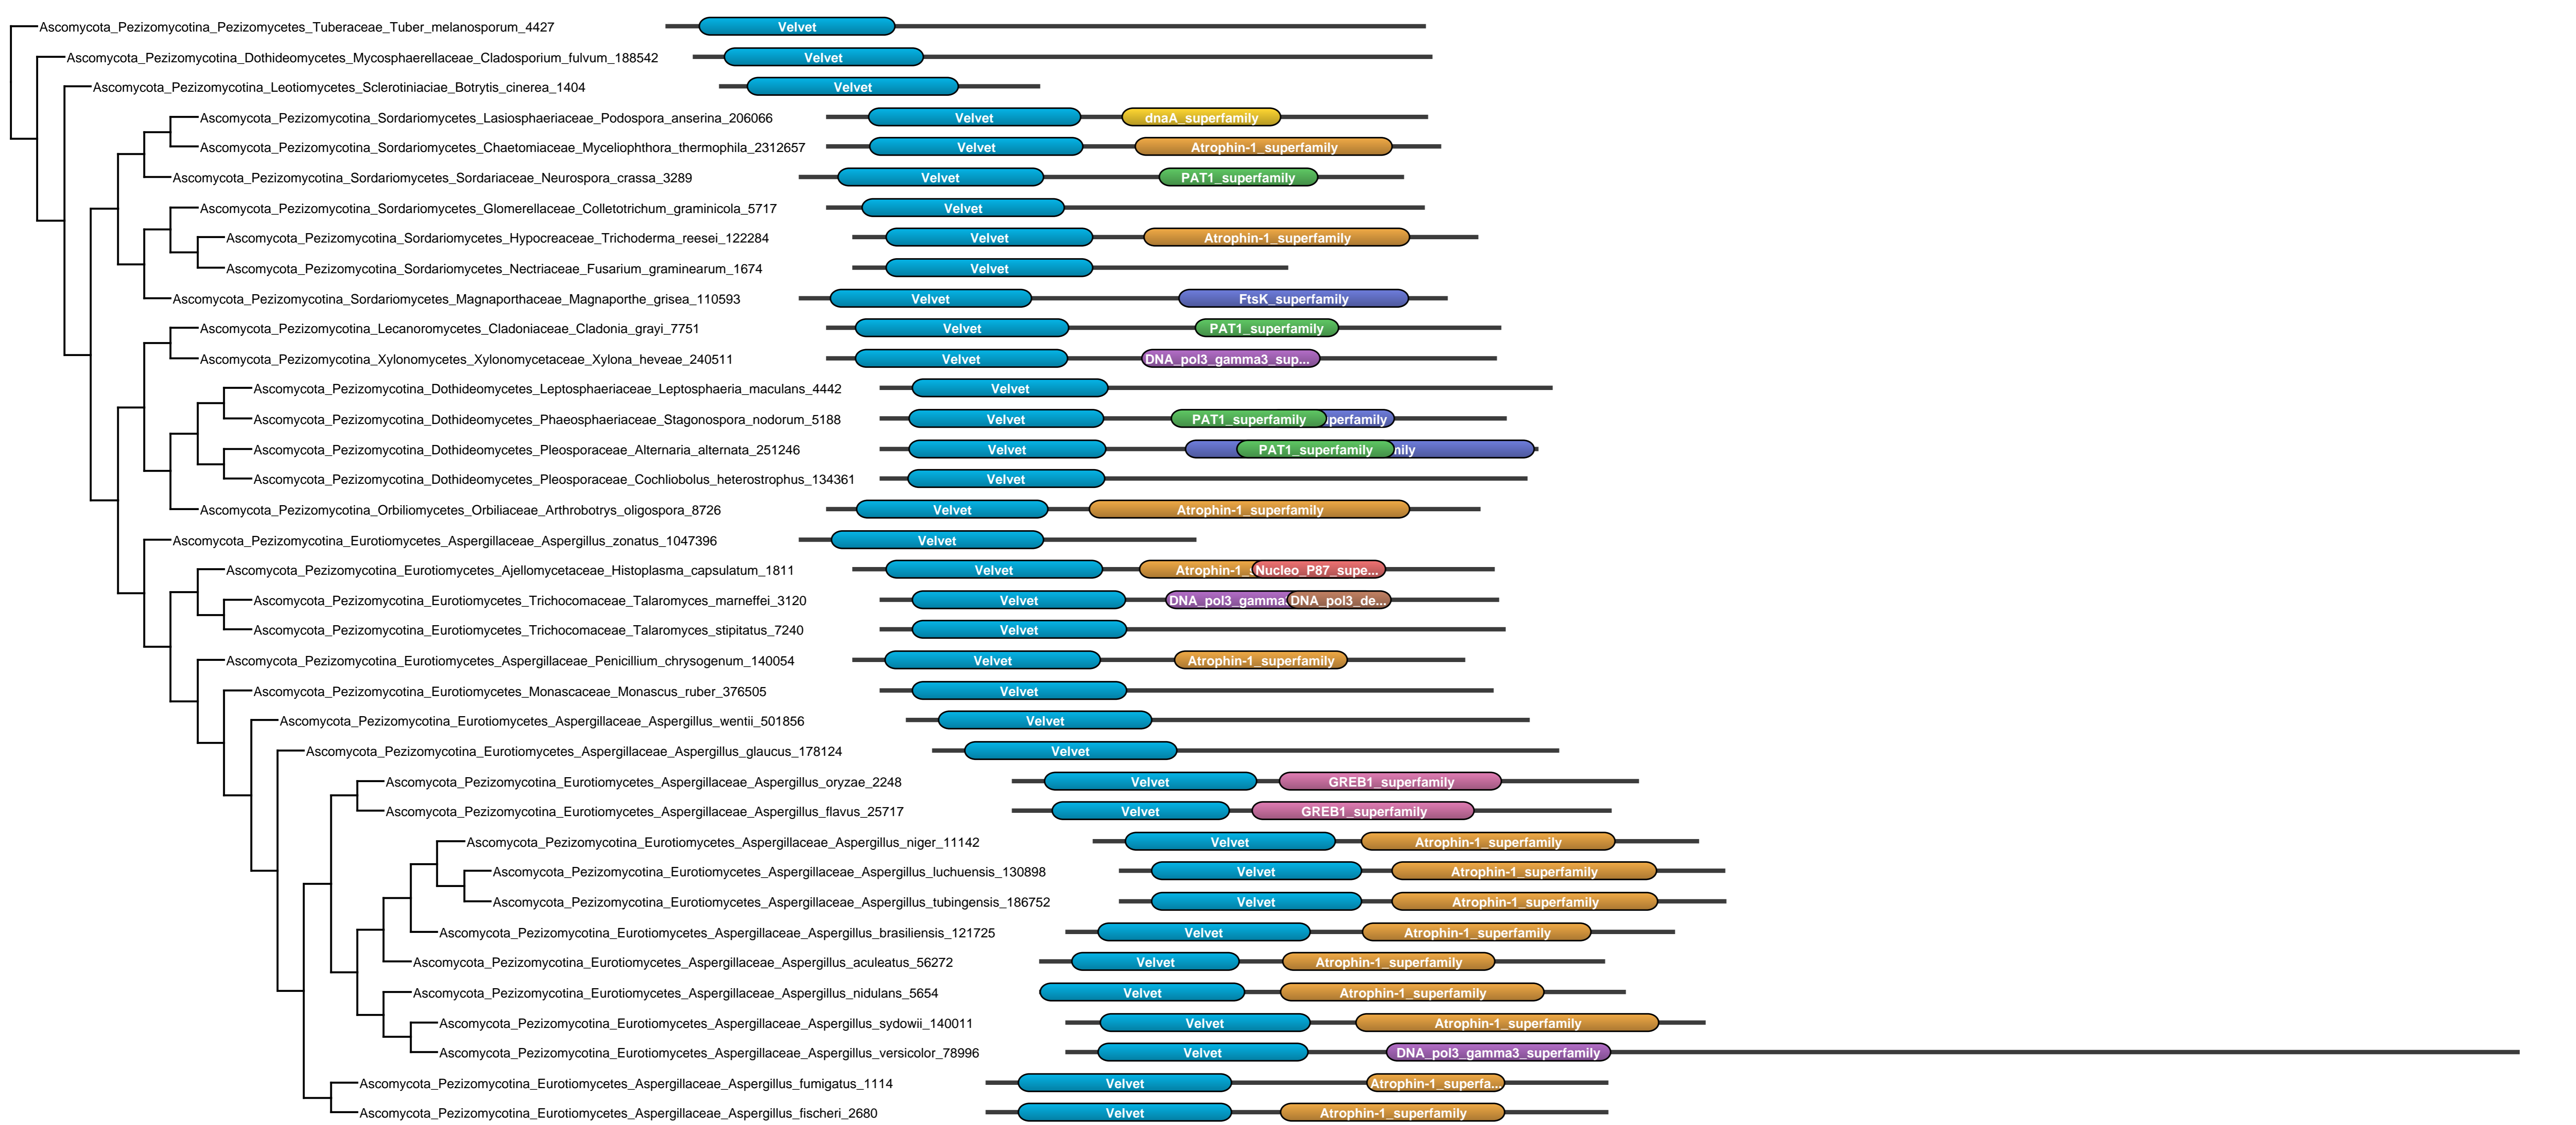

Supplement: mmc11.pdf [file mmc11.pdf]

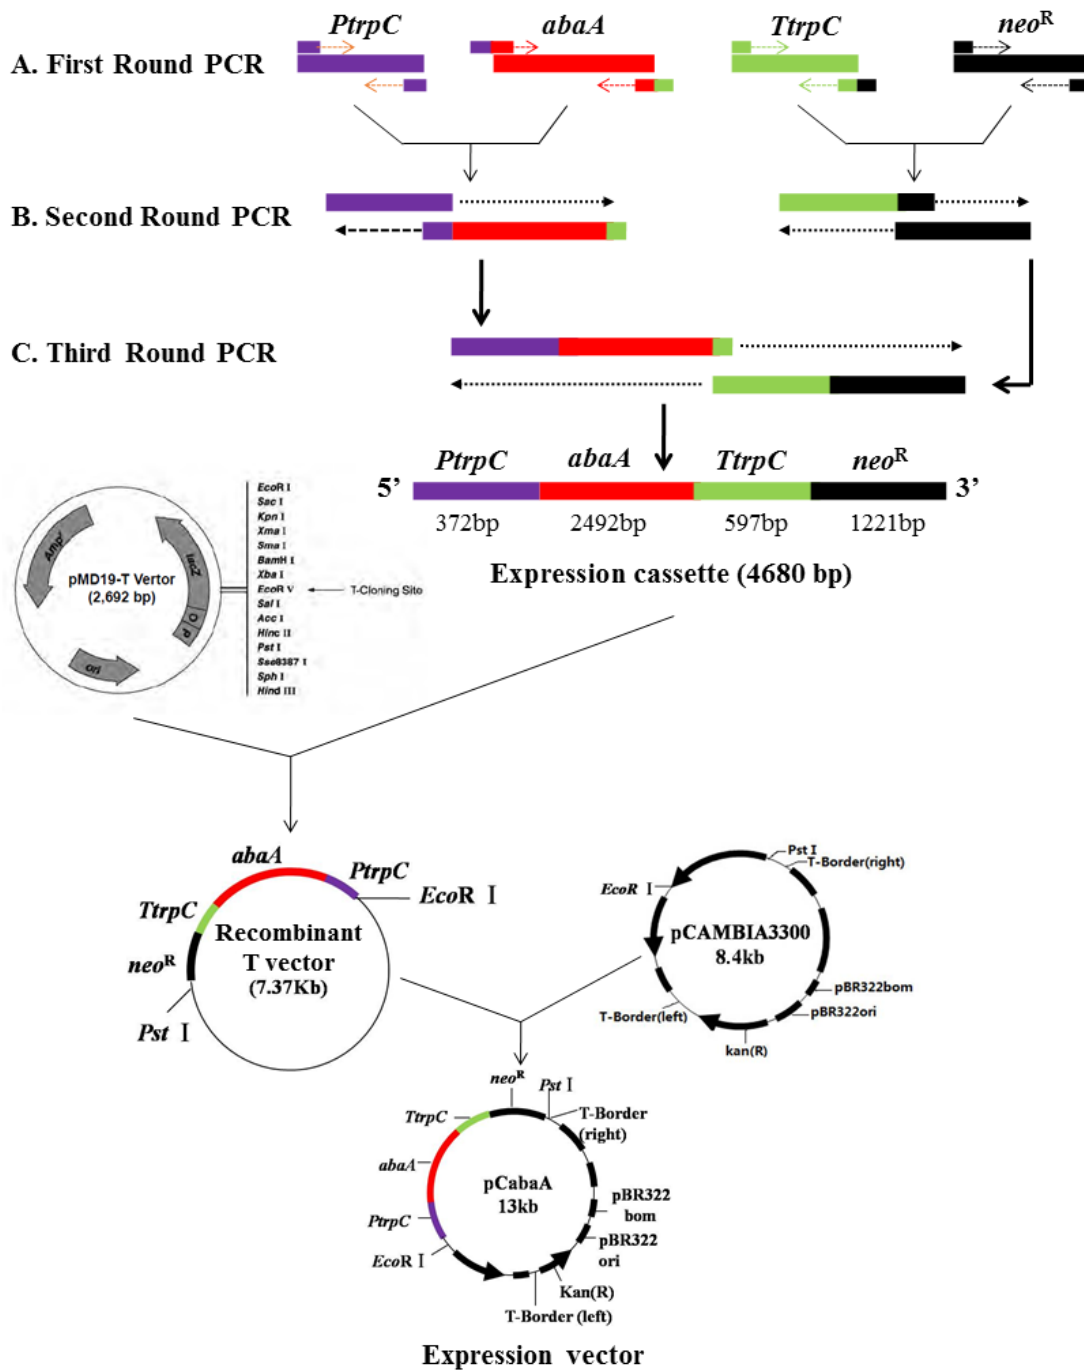

Supplement: mmc13.pdf [file mmc13.pdf]

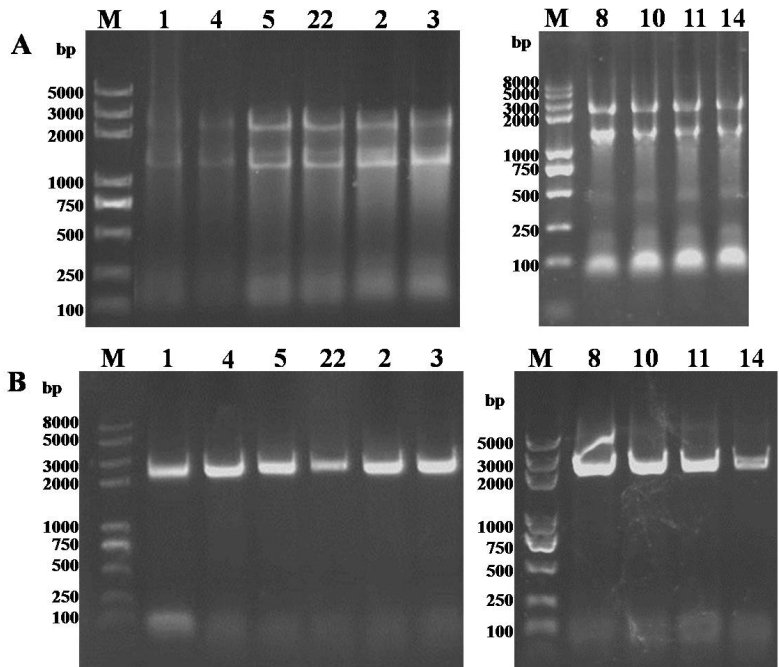

Supplement: mmc14.pdf [file mmc14.pdf]

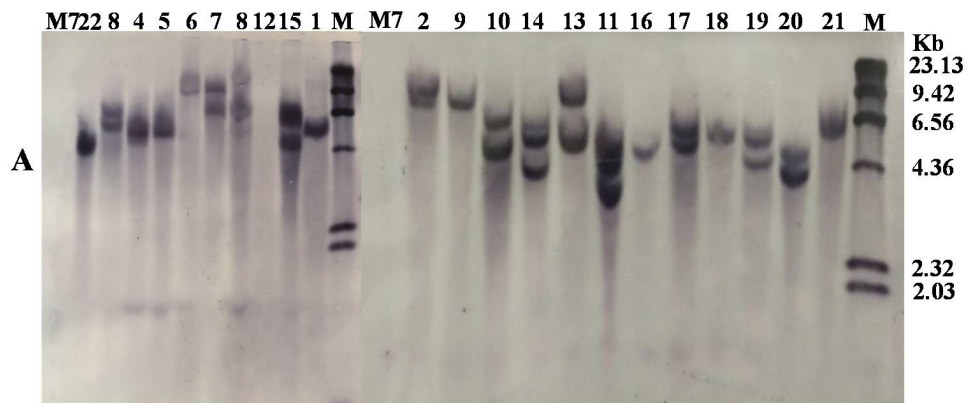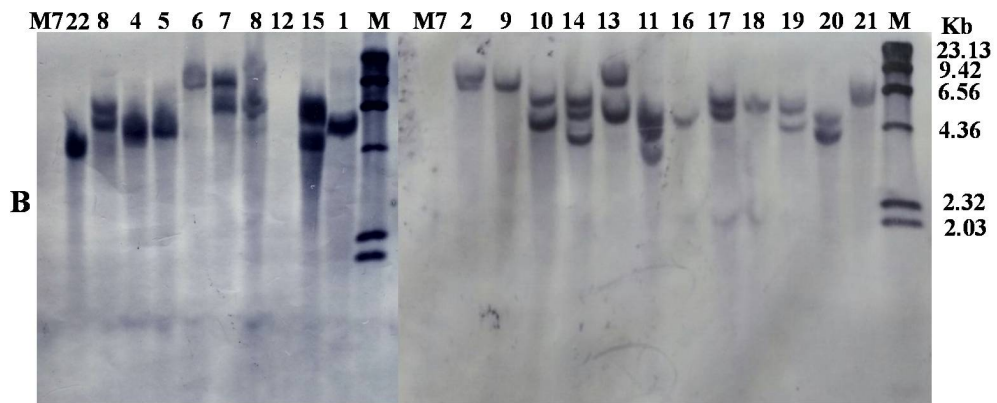

Supplement: mmc15.pdf [file mmc15.pdf]

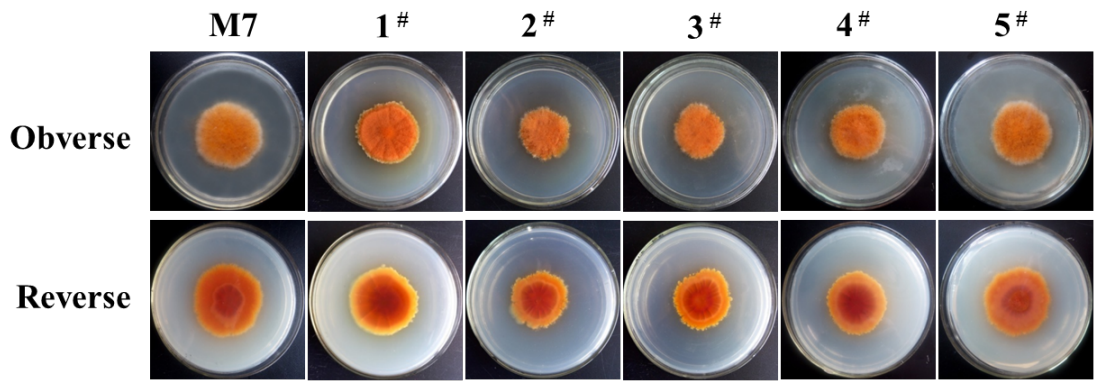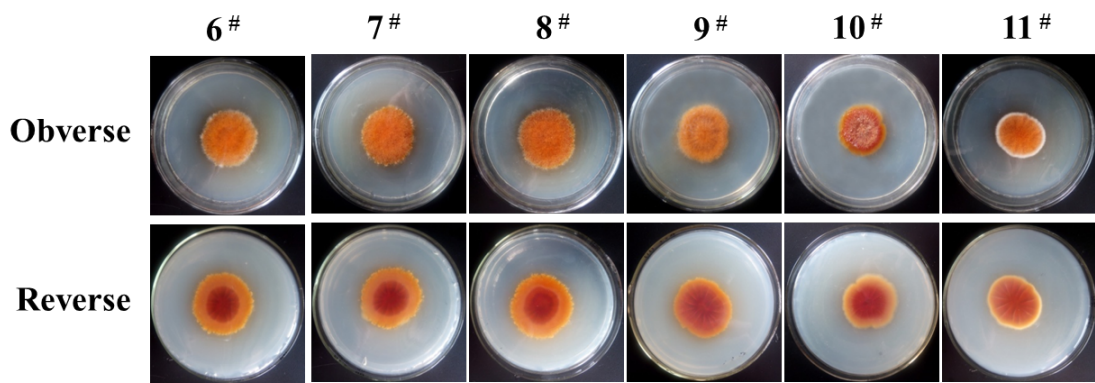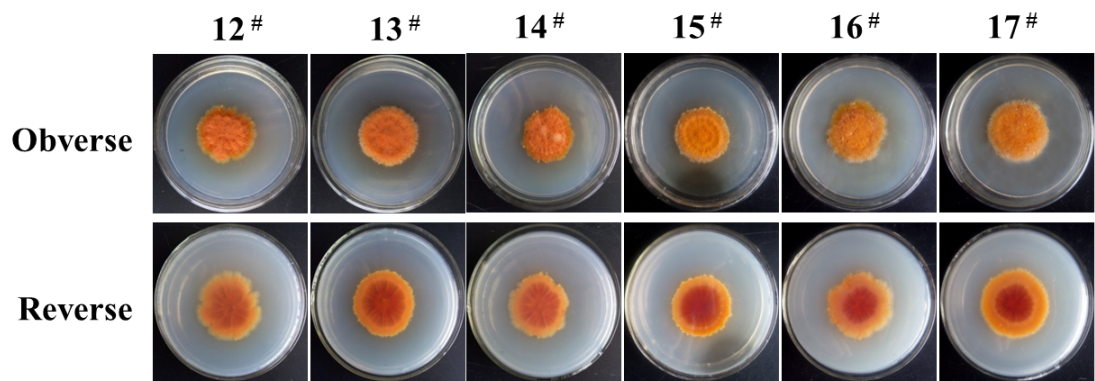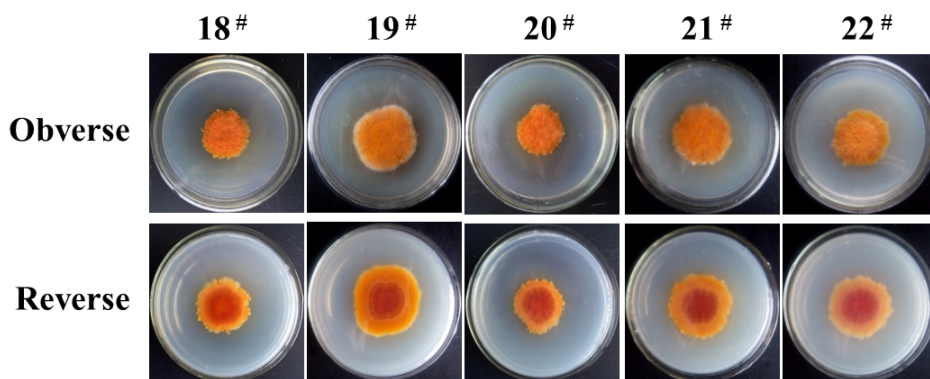

Supplement: mmc16.pdf [file mmc16.pdf]

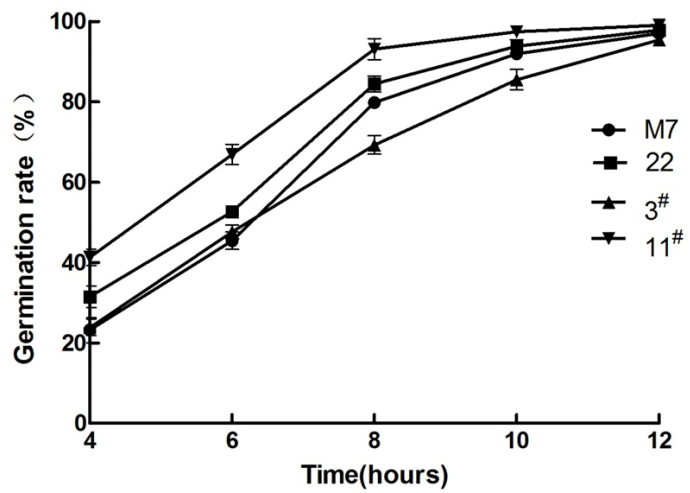

Supplement: mmc17.pdf [file mmc17.pdf]

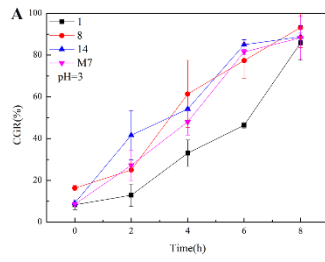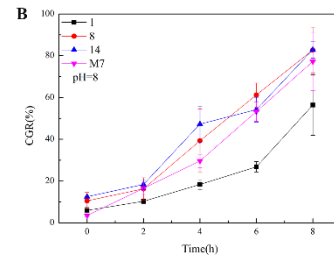

pH

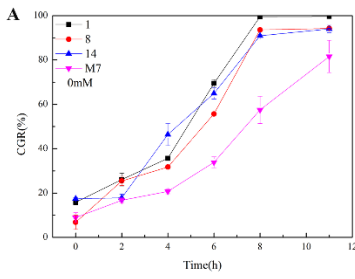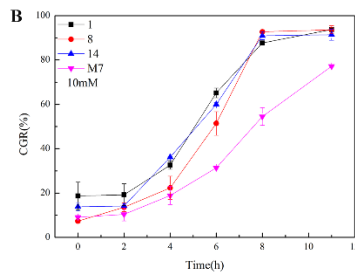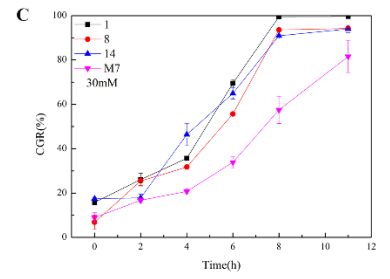

H<sub>2</sub>O<sub>2</sub> (mM)

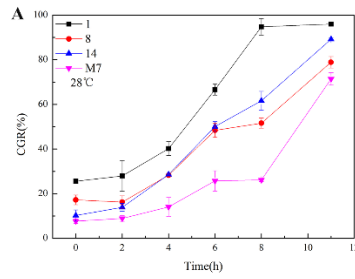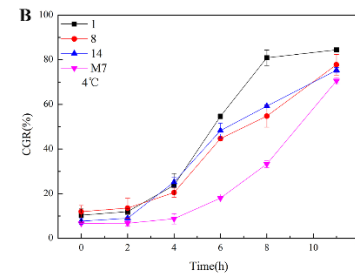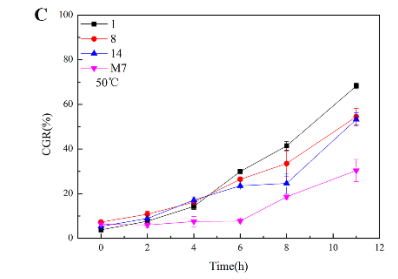

Temperature (°C)

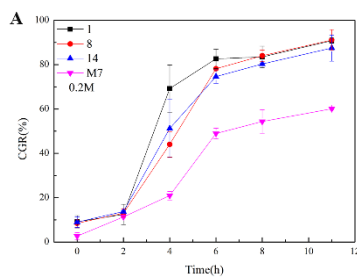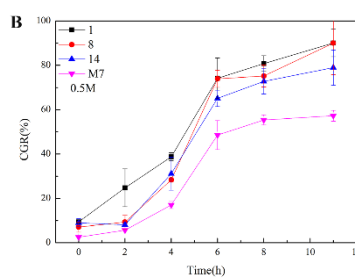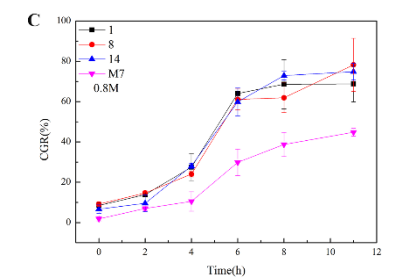

NaCl (M)

Supplement: mmc18.pdf [file mmc18.pdf]

**Domain(p<0.01)**  
**-log<sub>10</sub>(Fisher's exact p value)**

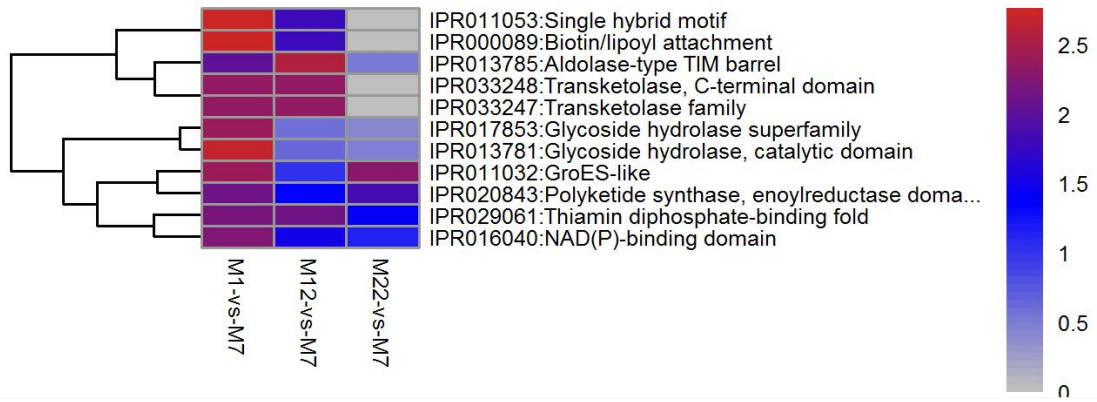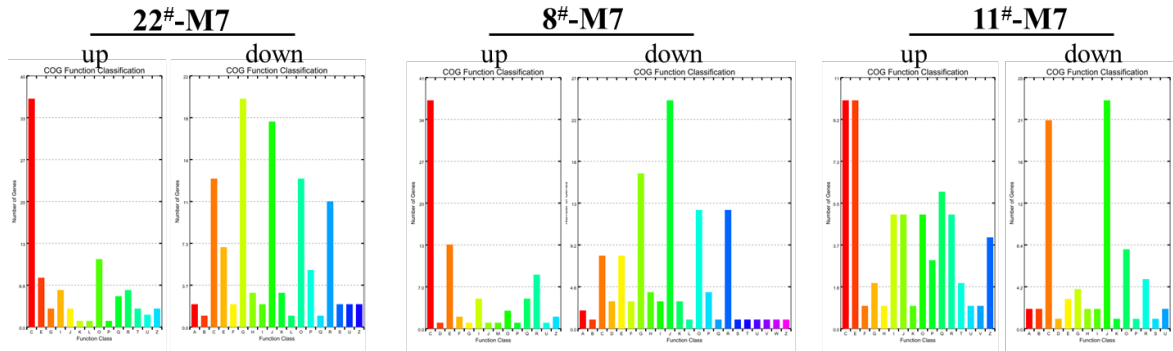

Supplement: mmc19.pdf [file mmc19.pdf]

MM 1 2 3 4 5 6 7 8 9 10 11 12 CTL

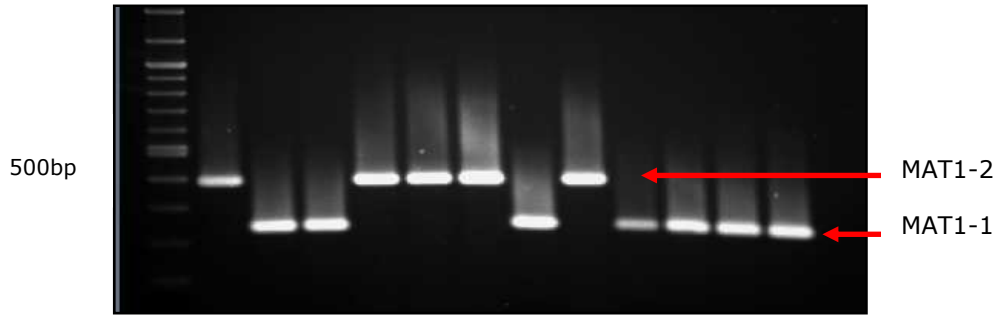

Supplement: mmc20.pdf [file mmc20.pdf]

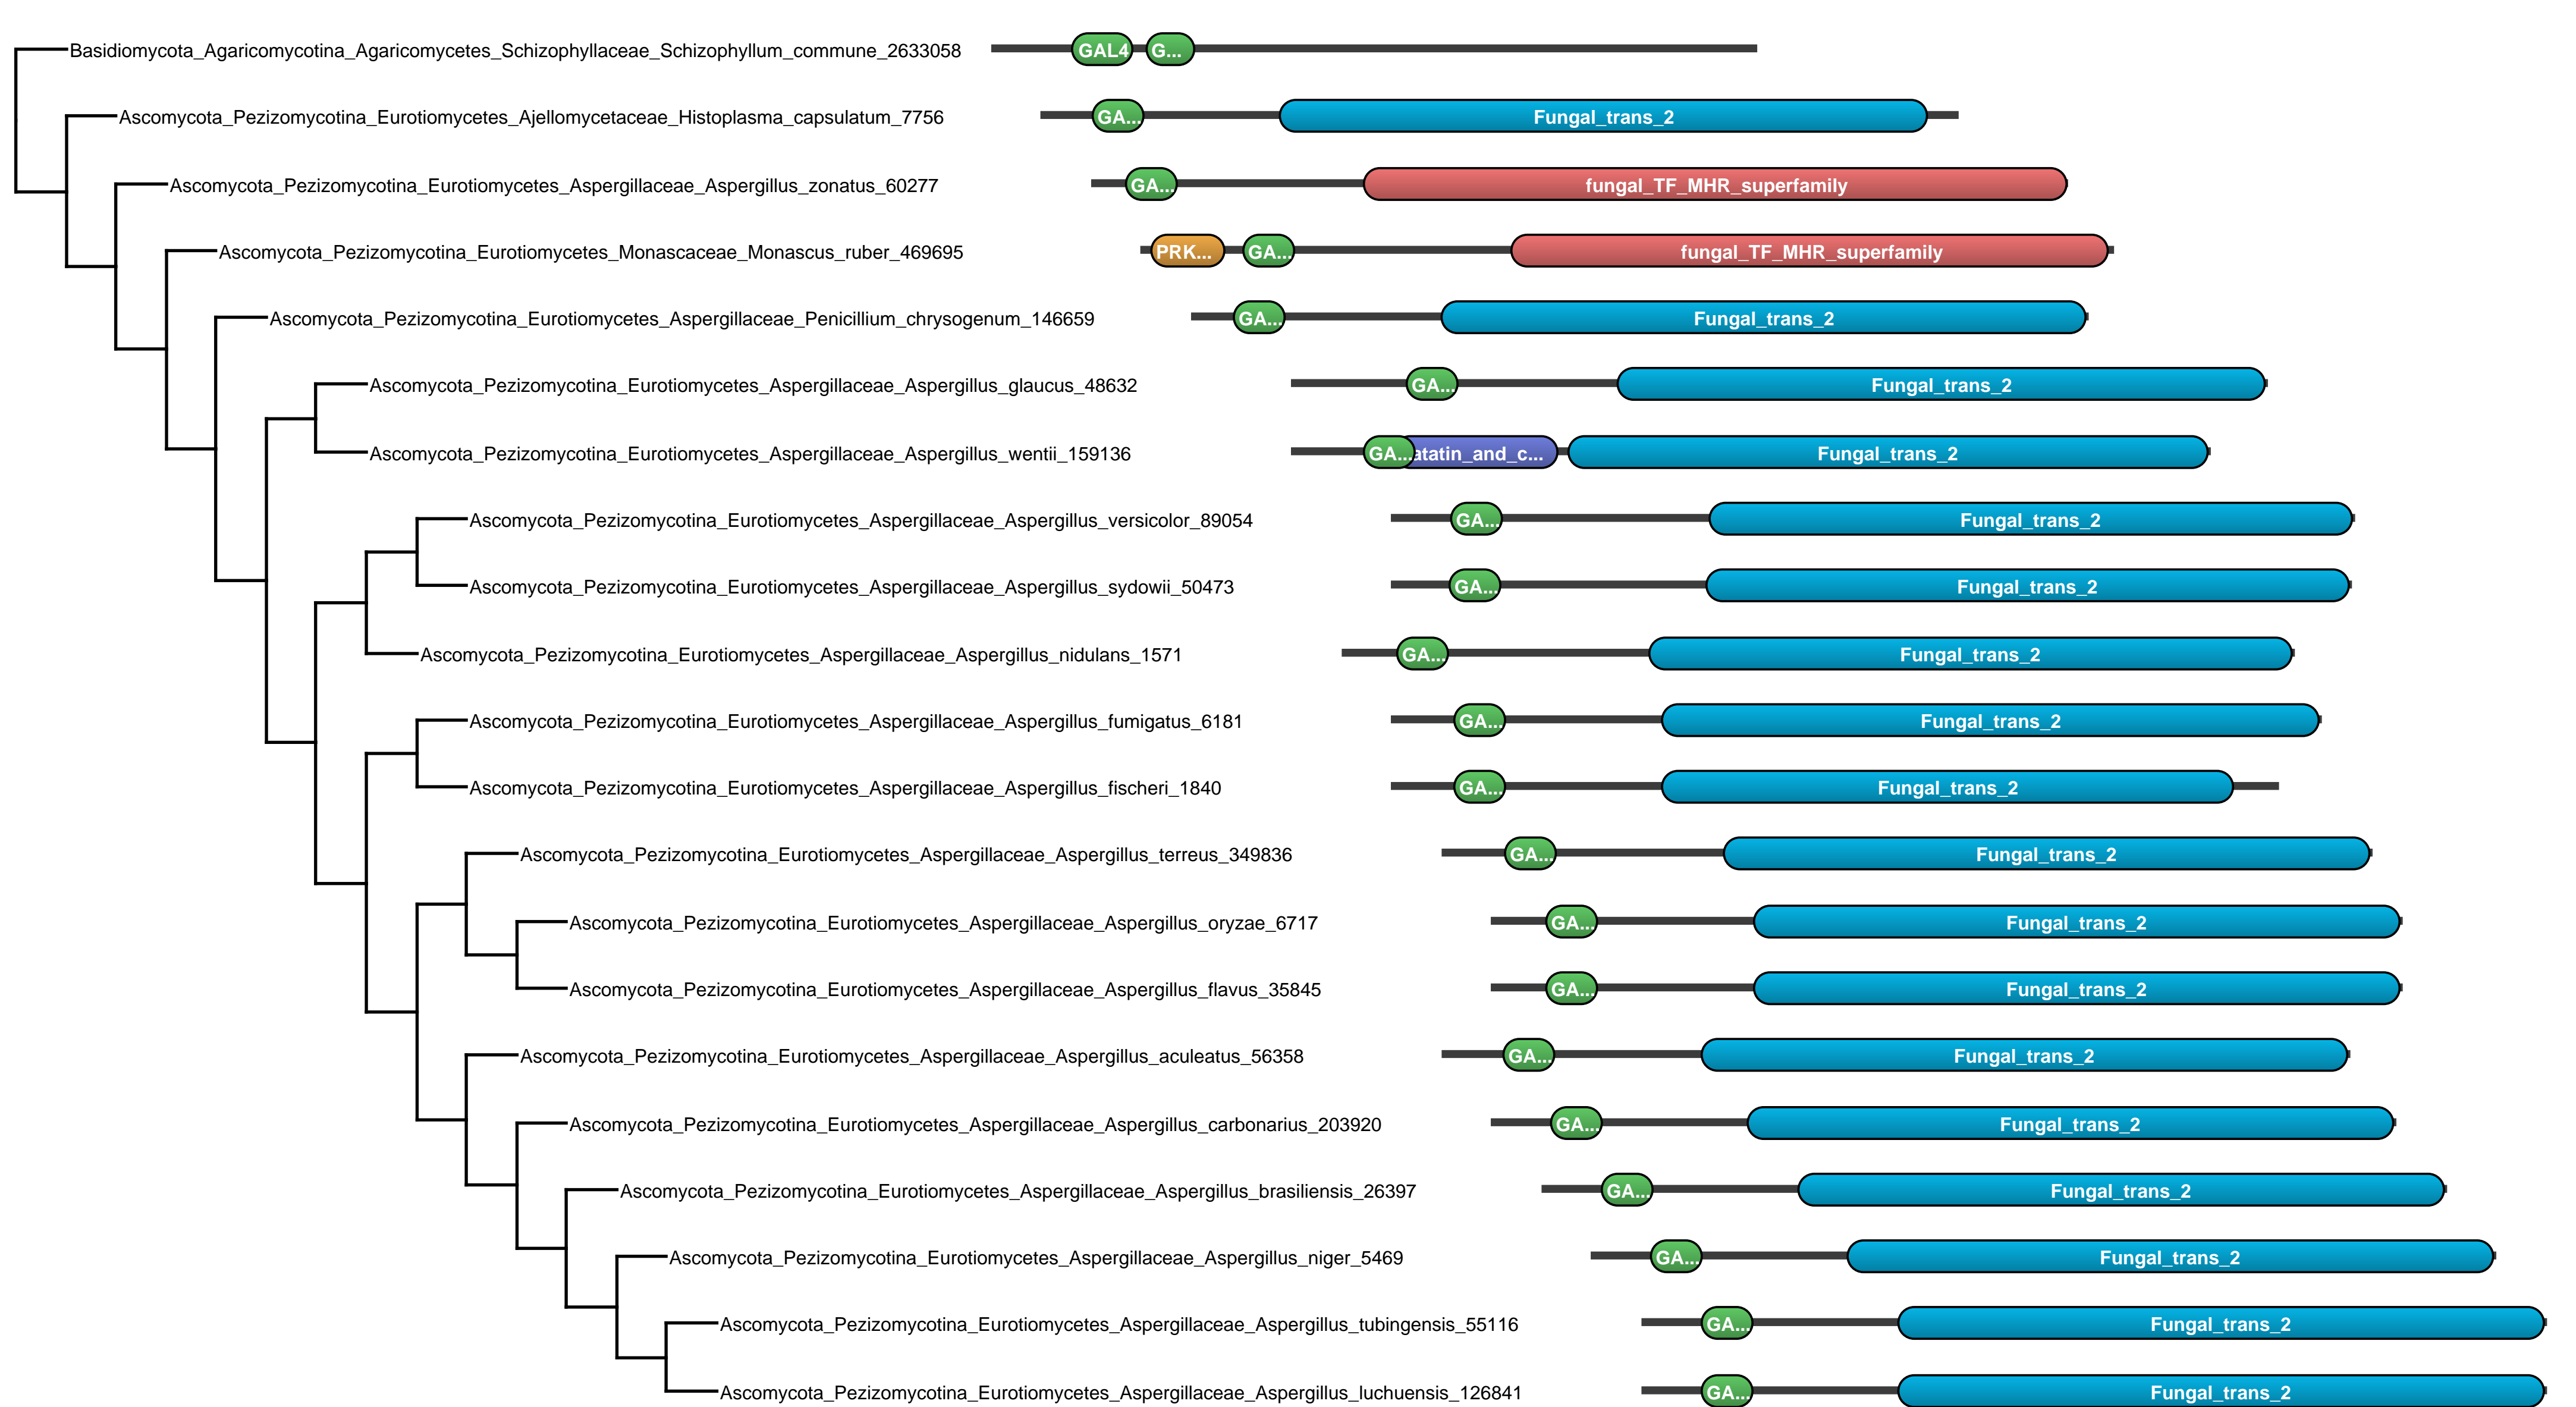

Supplement: mmc3.pdf [file mmc3.pdf]

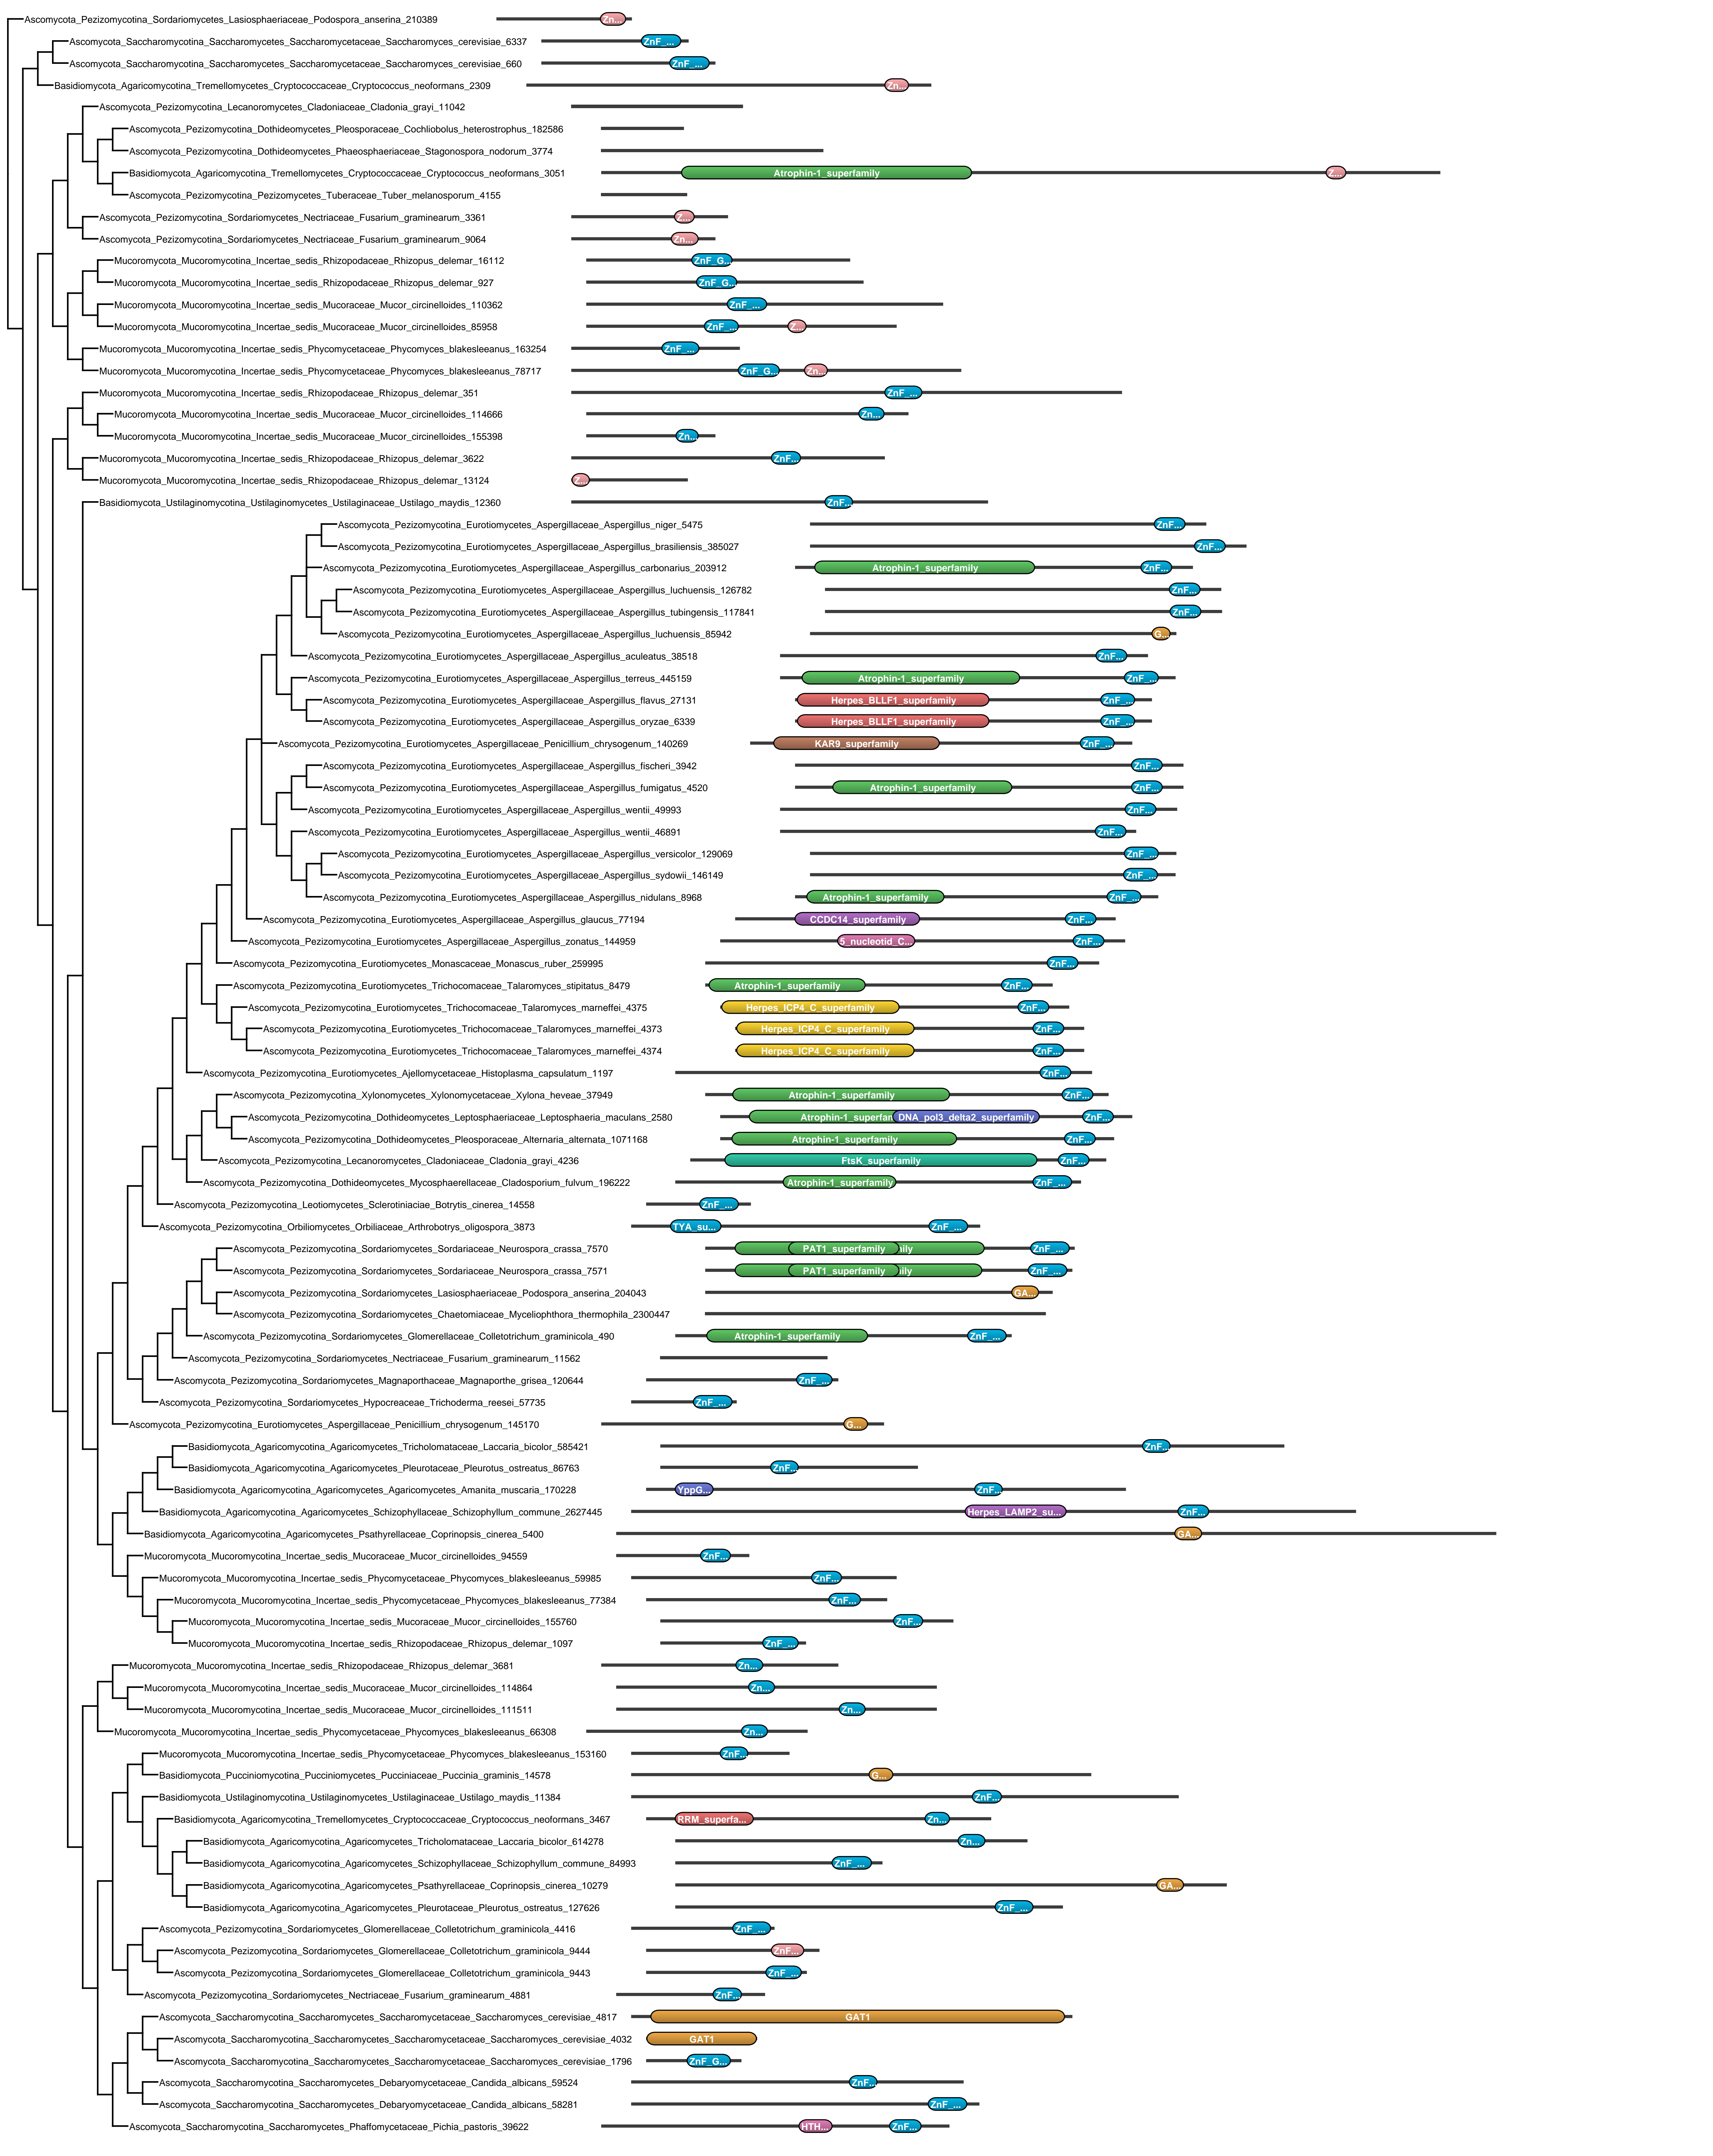

Supplement: mmc4.pdf [file mmc4.pdf]

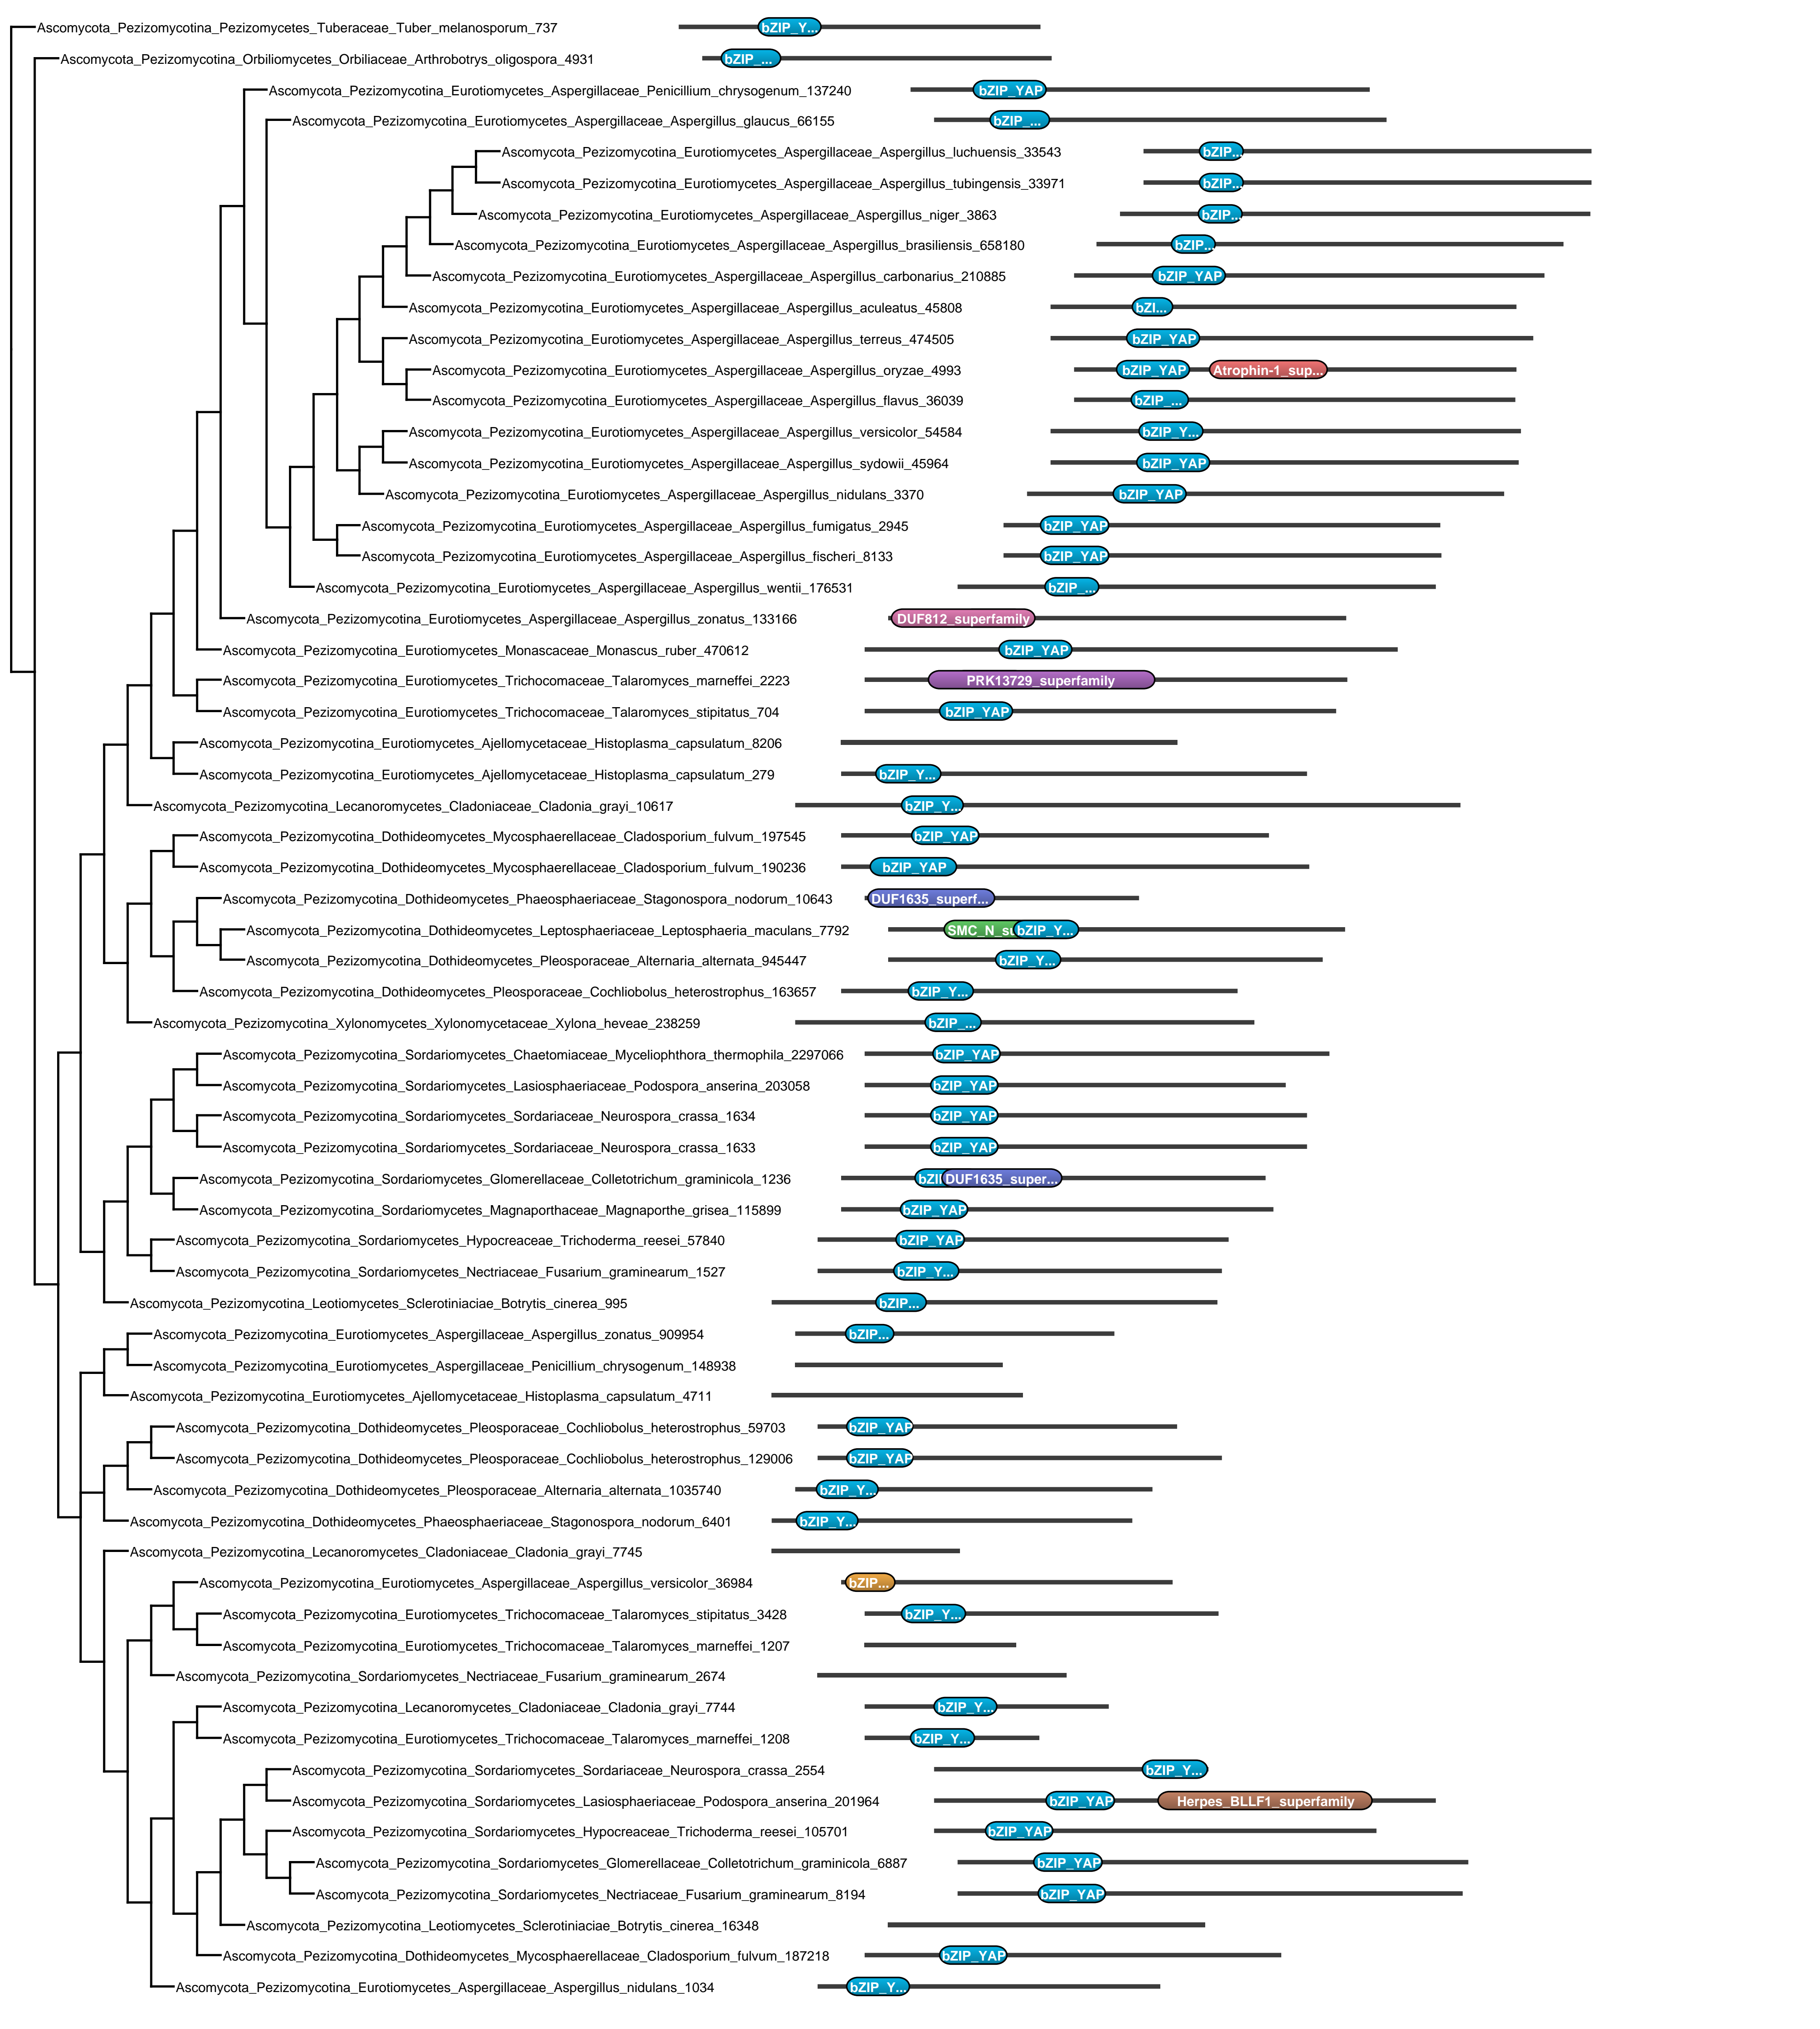

Supplement: mmc7.pdf [file mmc7.pdf]
